# Supplementary material for: Synergistic removal of dyes by Myrothecium verrucaria immobilization on a chitosan–Fe membrane
Source: Royal Society of Chemistry journal article supplement (doi:10.1039/c5ra11320b), 2015-01-01
Supplement: c5ra11320b1.pdf [file c5ra11320b1.pdf]

**Supporting Information for**  
**Synergistic removal of dyes by *Myrothecium verrucaria***  
**immobilization on chitosan-Fe membrane**

Yuezhong Wen <sup>a\*</sup>, Ying Liang <sup>b</sup>, Chensi Shen <sup>c</sup>, Dongmei Fu <sup>d</sup>, Hongyu Wang <sup>b</sup>

<sup>a</sup>Institute of Environmental Science, Zhejiang University, Hangzhou 310058, China

<sup>b</sup>College of Civil Engineering and Architecture, Zhejiang University of Technology,  
Hangzhou 310032, China

<sup>c</sup>College of Environmental Science and Engineering, Donghua University, Shanghai  
201620, China

<sup>d</sup>Dalian Institute of Chemical Physics, Chinese Academy of Sciences, Dalian 116023,  
China

---

\* Corresponding author:

Tel.: +86-571-8898-2421. Fax: +86-571-8898-2421.

E-mail address: [wenyuezhong@zju.edu.cn](mailto:wenyuezhong@zju.edu.cn) (Y.W.)

## Supplementary Table

**Table 1**

Characteristics of the dyes used

| CI name       | CI number | $\lambda_{\max}$ (nm) | Structure |
|---------------|-----------|-----------------------|-----------|
| Acid red 73   | 27290     | 509                   |           |
| Acid Blue 113 | 26360     | 568                   |           |
